# Supplementary material for: Amelioration of experimental autoimmune encephalomyelitis through transplantation of placental derived mesenchymal stem cells
Source: PubMed Central journal article supplement (PMC5301256; doi:10.1038/srep41837), 2017-02-10
Supplement: srep41837-s1.pdf [file srep41837-s1.pdf]

**Amelioration of experimental autoimmune encephalomyelitis through transplantation of placental derived mesenchymal stem cells**

Hong Jiang<sup>1</sup>, Yuanyuan Zhang<sup>2#</sup>, Kewei Tian<sup>2#</sup>, Beibei Wang<sup>3</sup>, Shu Han<sup>2\*</sup>

<sup>1</sup> Department of Electrophysiology, Sir Run Run Shaw Hospital, Medical College, Zhejiang University, Hangzhou, China

<sup>2</sup> Institute of Anatomy and Cell Biology, Medical College, Zhejiang University, Hangzhou, China

<sup>3</sup> Core Facilities, Zhejiang University School of Medicine, Hangzhou, China

#These authors contributed equally to this work.

**\*Correspondence to:** Dr. Shu Han

Institute of Anatomy and Cell Biology, Medical College, Zhejiang University, 866

Yuhangtang Road, Hangzhou 310058, China. **Tel.:** +86-571-88208160; **Fax:**

+86-571-88208094; **Email:** han00shu@zju.edu.cn.

## Supplemental figure legends

**Figure S1. Differentiation of PMSCs cultured in vitro.** PMSCs from passage 3 exhibits morphological characterization of different neural cell lines. (A-D) Astrocytes-like cells differentiate from PMECs. (E-H) Oligodendrocytes-like cells differentiate from PMECs. (I-L) Microcyte-like cells differentiate from PMECs. (M-P) Neuron-like cells differentiate from PMECs.

## Figure S2. Both EMSCs and PMECs treatment reverse electrophysiological dysfunction

(A-B): EMSCs and PMSCs treatments reduce the clinical severity of EAE in rats at 3 (A) and 8 (B) weeks post-injection, as measured by determining somatosensory-evoked potential (c-SEP) latencies and amplitudes (measured from peak to peak between negative deflection (N) and positive deflection (P)). The amplitude of c-SEP is notably lower in vehicle-treated EAE rats and the latency is also significantly prolonged, while treatments with EMSCs and PMSCs effectively reversed these phenomena. (C-D): Motor-evoked potential (MEP) amplitude was also significantly lower in vehicle-treated EAE rats and latency is significantly prolonged at 3 (C) and 8 (D) weeks post-injection. Similarly, these phenomena are reversed following EMSCs and PMSCs treatments.

**Figure S3.** Compared with the vehicle-treated group, EMSCs and PMSCs treatments effectively reduce the expression of pro-inflammatory factors NF- $\kappa$ B (A-C), TNF- $\alpha$  (D-F), COX-2 (G-I), but maintained the expression of oligodendrocyte marker MBP (J-L) as detected by Western blotting. Data are represented as mean  $\pm$  SD. n=5, degrees of

freedom=n-1. **Nfkb**: \*P<0.05 Vs Normal group (3w Vehicle group: F=0.07, P<0.0001; EMSCs group: F=0.04, P=0.009; 8w PI, Vehicle group: F=0.33, P<0.0001; EMSCs group: F=0.26, P=0.0002) & P<0.01 Vs Vehicle group (3w PI, EMSCs group: F=0.57, P=0.007; PMECs group: F=4.19, P<0.0001. 8w PI, EMSCs group: F=0.78, P<0.0001; PMECs group: F=0.35, P<0.0001). # P<0.05 Vs EMSCs group (3w PI, PMSCs group: F=0.13, P=0.01; 8w PI, PMSCs group: F=0.44, P=0.048). **TNF- $\alpha$** : \*P<0.05 Vs Normal group (3w Vehicle group: F=1.76, P<0.0001; EMSCs group: F=0.69, P<0.0001. PMECs group: F=0.65, P=0.0002; 8w PI, Vehicle group: F=0.03, P<0.0001; EMSCs group: F=0.1, P=0.0007. PMECs group: F=0.82, P=0.004) & P<0.01 Vs Vehicle group (3w PI, EMSCs group: F=0.39, P<0.0001; PMECs group: F=0.37, P<0.0001. 8w PI, EMSCs group: F=3.05, P<0.0001; PMECs group: F=26.23, P<0.0001). # P<0.01 Vs EMSCs group (8w PI, PMSCs group: F=0.11, P=0.0003). **COX-2**: \*P<0.05 Vs Normal group (3w Vehicle group: F=0.3, P<0.0001; EMSCs group: F=0.15, P=0.0001. PMECs group: F=0.27, P=0.0007; 8w PI, Vehicle group: F=0.05, P<0.0001; PMECs group: F=0.54, P<0.0001) & P<0.01 Vs Vehicle group (3w PI, EMSCs group: F=0.51, P<0.0001; PMECs group: F=0.89, P<0.0001. 8w PI, EMSCs group: F=1.56, P<0.0001; PMECs group: F=10.62, P<0.0001). # P<0.01 Vs EMSCs group (3w PI, PMSCs group: F=0.58, P<0.0001; 8w PI, PMSCs group: F=6.8, P=0.0009), **MBP**: \*P<0.05 Vs Normal group (3w Vehicle group: F=0.4, P<0.0001; 8w PI, Vehicle group: F=1.25, P<0.0001; PMECs group: F=0.54, P<0.0001) & P<0.01 Vs Vehicle group (3w PI, EMSCs group: F=0.91, P<0.0001; PMECs group: F=0.53, P<0.0001. 8w PI, EMSCs group: F=0.07, P=0.0002; PMECs group: F=0.16, P<0.0001).

**Figure S4. The expression of pro-inflammatory factors in response to EMSCs and PMSCs treatments. At 3 weeks post-injection, the expression of pro-inflammatory factors NF- $\kappa$ B (A–F) \*P<0.01 Vs Normal group (3w PI, in SP, Vehicle group: F=1.07, P<0.0001; EMSCs group: F=0.14, P<0.0001; PMECs group: F=0.23, P<0.0001. In BC, Vehicle group: F=157.26, P<0.0001; EMSCs group: F=286.87, P<0.0001; PMECs group: F=136.57, P<0.0001. 8w PI, in SP, Vehicle group: F=0.92, P<0.0001; EMSCs group: F=0.69, P<0.0001; PMECs group: F=0.34, P<0.0001. In BC, Vehicle group: F=0.08, P<0.0001; EMSCs group: F=0.12, P<0.0001; PMECs group: F=0.49, P<0.0001) & P<0.01 Vs Vehicle group (3w PI, In SP, EMSCs group: F=0.13, P<0.0001; PMECs group: F=0.21, P<0.0001. In BC, EMSCs group: F=0.55, P<0.0001; PMECs group: F=1.15, P<0.0001. 8w PI, In SP, EMSCs group: F=0.37, P<0.0001; PMECs group: F=0.75, P<0.0001. In BC, EMSCs group: F=1.48, P<0.0001; PMECs group: F=6.16, P<0.0001), COX-2 (G-L) \*P<0.01 Vs Normal group (3w PI, in SP, Vehicle group: F=0.05, P<0.0001; EMSCs group: F=0.28, P<0.0001; PMECs group: F=0.24, P<0.0001. In BC, Vehicle group: F=4.36, P<0.0001; EMSCs group: F=0.54, P<0.0001; PMECs group: F=0.7, P<0.0001. 8w PI, in SP, Vehicle group: F=0.22, P<0.0001; EMSCs group: F=0.15, P<0.0001; PMECs group: F=0.54, P<0.0001. In BC, Vehicle group: F=0.03, P<0.0001; EMSCs group: F=0.1, P<0.0001; PMECs group: F=0.06, P<0.0001) & P<0.01 Vs Vehicle group (3w PI, In SP, EMSCs group: F=0.17, P<0.0001; PMECs group: F=0.2, P<0.0001. In BC, EMSCs group: F=2.36, P<0.0001; PMECs group: F=3.07, P<0.0001. 8w PI, In SP, EMSCs group: F=1.45, P<0.0001; PMECs group: F=2.43, P<0.0001. In BC, EMSCs group: F=0.34, P<0.0001; PMECs group: F=0.55, P<0.0001) and TNF- $\alpha$ (M–R) \*P<0.01 Vs Normal group (3w PI, in SP, Vehicle group: F=7.41, P<0.0001;**

EMSCs group:  $F=7.89$ ,  $P<0.0001$ ; PMECs group:  $F=13.42$ ,  $P=0.0007$ . In BC, Vehicle group:  $F=0.001$ ,  $P<0.0001$ ; EMSCs group:  $F=0.001$ ,  $P<0.0001$ ; PMECs group:  $F=0.0009$ ,  $P<0.0001$ . 8w PI, in SP, Vehicle group:  $F=0.33$ ,  $P<0.0001$ ; EMSCs group:  $F=0.13$ ,  $P<0.0001$ ; PMECs group:  $F=0.48$ ,  $P<0.0001$ . In BC, Vehicle group:  $F=7.08$ ,  $P<0.0001$ ; EMSCs group:  $F=10.51$ ,  $P=0.0002$ ; PMECs group:  $F=9.86$ ,  $P=0.0002$ ) &  $P<0.01$  Vs Vehicle group (3w PI, In SP, EMSCs group:  $F=0.94$ ,  $P<0.0001$ ; PMECs group:  $F=1.81$ ,  $P<0.0001$ . In BC, EMSCs group:  $F=1.02$ ,  $P<0.0001$ ; PMECs group:  $F=1.23$ ,  $P<0.0001$ . 8wPI, In SP, EMSCs group:  $F=2.53$ ,  $P<0.0001$ ; PMECs group:  $F=0.68$ ,  $P<0.0001$ . In BC, EMSCs group:  $F=1.49$ ,  $P<0.0001$ ; PMECs group:  $F=1.39$ ,  $P<0.0001$ ) **are increased in vehicle-treated rats relative to normal control rats, while expressions is alleviated in both EMSCs and PMSCs treated rats.**

**TRIFC-conjugated immunofluorescent staining. Bar = 100 $\mu$ m. Data are represented as mean  $\pm$  SD. n=5, degrees of freedom=4.**

**Figure S5. EAE-induction slightly increases the expression of growth-associated protein GAP-43 in the early stages of disease, but expression decreased as EAE progressed. However, EMSCs and PMSCs treatments markedly up-regulated the expression of GAP-43.** (A-N): TRIFC-conjugated red immunofluorescence indicate GAP-43 staining, Scale bar = 100  $\mu$ m. (BC) Coronal sections of the brain cortex. Data are represented as mean  $\pm$  SD. n=5, degrees of freedom=4. \* $P<0.01$  Vs Normal group (3w PI, in SP, Vehicle group:  $F=0.02$ ,  $P<0.0001$ ; EMSCs group:  $F=0.003$ ,  $P<0.0001$ ; PMECs group:  $F=0.004$ ,  $P<0.0001$ . In BC, Vehicle group:  $F=0.15$ ,  $P=0.0001$ ; EMSCs group:  $F=0.03$ ,  $P<0.0001$ ; PMECs group:  $F=0.02$ ,  $P<0.0001$ . 8wPI, in SP, Vehicle group:  $F=0.09$ ,  $P<0.0001$ ; EMSCs group:  $F=0.03$ ,

P<0.0001;PMECs group: F=0.06, P<0.0001. In BC, Vehicle group: F=0.07, P<0.0001; EMSCs group: F=0.05, P<0.0001;PMECs group: F=0.03, P=0.0006.) & P<0.01 Vs Vehicle group (3w PI, In SP, EMSCs group: F=0.16, P<0.0001;PMECs group: F=0.19, P<0.0001. In BC, EMSCs group: F=0.11, P<0.0001;PMECs group: F=0.2, P<0.0001. 8w PI, In SP, EMSCs group: F=2.96, P<0.0001;PMECs group: F=0.63, P<0.0001. In BC, EMSCs group: F=0.8, P=0.0003;PMECs group: F=0.39, P=0.008).

**Figure S6. EMSCs and PMECS treatments reduce neuronal apoptosis.** In vehicle-treated EAE rats, the expression of active caspase-3 is markedly increased. This phenomenon could be reversed by EMSCs and PMSCs treatments, as shown by calculated TRIFC-conjugated (red color) immunofluorescence stained caspase-3 positive cells (scale bar = 100 $\mu$ m). (SC) Transverse sections through the anterior horn of the lumbar spinal. (BC) Coronal sections of the brain cortex. Data are represented as mean  $\pm$  SD. n=5, degrees of freedom=4. \*P<0.01 Vs Normal group (3w PI, in SP, Vehicle group: F=0.03, P<0.0001; EMSCs group: F=0.04, P<0.0001;PMECs group: F=0.17, P<0.0001. In BC, Vehicle group: F=0.04, P<0.0001; EMSCs group: F=0.06, P=0.0002;PMECs group: F=0.2, P<0.0001. 8w PI, in SP, Vehicle group: F=0.2, P<0.0001; EMSCs group: F=0.43, P<0.0001; PMECS group: F=0.39, P<0.0001. In BC, Vehicle group: F=0.08, P<0.0001; EMSCs group: F=0.1, P<0.0001; PMECS group: F=0.3, P<0.0001) & P<0.01 Vs Vehicle group (3w PI, In SP, EMSCs group: F=1.4, P<0.0001; PMECS group: F=6.03, P<0.0001. In BC, EMSCs group: F=1.39, P<0.0001; PMECS group: F=4.8, P<0.0001. 8w PI, In SP, EMSCs group: F=2.15, P<0.0001; PMECS group: F=1.96, P<0.0001. In BC, EMSCs group: F=1.16, P<0.0001; PMECS group: F=3.49, P<0.0001.) #

$P < 0.01$  Vs EMSCs group (8w PI, In SP, PMSCs group:  $F=1.1$ ,  $P < 0.0001$ ; In BC, PMSCs group:  $F=3$ ,  $P=0.0005$ ).

**Figure S7. EMSCs and PMSCs treatments alleviate neuronal loss in the spinal cord and cerebral cortex when compared with the vehicle-treated group. NF-200**

immunofluorescence staining (red), scale bar = 100  $\mu$ m. (SC) Transverse sections through the anterior horn of the lumbar spinal. (BC) Coronal sections of the brain cortex. Data are represented as mean  $\pm$  SD.  $n=5$ , degrees of freedom=4. \* $P < 0.01$  Vs Normal group (3w PI, in SP, Vehicle group:  $F=0.23$ ,  $P < 0.0001$ ; EMSCs group:  $F=0.12$ ,  $P < 0.0001$ ; PMECs group:  $F=0.12$ ,  $P < 0.0001$ . In BC, Vehicle group:  $F=0.04$ ,  $P < 0.0001$ ; EMSCs group:  $F=0.02$ ,  $P=0.00064$ ; PMECs group:  $F=0.02$ ,  $P=0.0001$ . 8w PI, in SP, Vehicle group:  $F=0.07$ ,  $P < 0.0001$ ; EMSCs group:  $F=0.05$ ,  $P < 0.0001$ ; PMECs group:  $F=0.48$ ,  $P < 0.0001$ . In BC, Vehicle group:  $F=0.04$ ,  $P < 0.0001$ ; EMSCs group:  $F=0.02$ ,  $P=0.0088$ ; PMECs group:  $F=0.02$ ,  $P=0.002$ ) &  $P < 0.01$  Vs Vehicle group (3w PI, In SP, EMSCs group:  $F=0.51$ ,  $P < 0.0001$ ; PMECs group:  $F=0.52$ ,  $P < 0.0001$ . In BC, EMSCs group:  $F=0.57$ ,  $P < 0.0001$ ; PMECs group:  $F=0.56$ ,  $P=0.0004$ . 8w PI, In SP, EMSCs group:  $F=0.75$ ,  $P=0.00011$ ; PMECs group:  $F=6.57$ ,  $P < 0.0001$ . In BC, EMSCs group:  $F=0.41$ ,  $P < 0.0001$ ; PMECs group:  $F=0.48$ ,  $P < 0.0001$ .) #  $P < 0.05$  Vs EMSCs group (3w PI, In SP, PMSCs group:  $F=0.98$ ,  $P=0.03$ ; In BC, PMSCs group:  $F=1$ ,  $P=0.004$ . 8w PI, In SP, PMSCs group:  $F=0.11$ ,  $P=0.02$ ).

**Figure S8. EMSCs and PMECs treatments reverse the decrease of BDNF and CNTF in CNS, increase the expression of growth-associated protein GAP-43, and reduce**

**apoptosis related enzyme caspase-3 in EAE.** (A-C): EAE-induction slightly increases the expression of growth-associated protein GAP-43 compared with healthy controls, but EMSCs and PMSCs treatments markedly increased expression. \* $P < 0.01$  Vs Normal group (3w Vehicle group:  $F = 1.85$ ,  $P = 0.0009$ ; EMSCs group:  $F = 0.33$ ,  $P < 0.0001$ ; PMECs group:  $F = 0.65$ ,  $P < 0.0001$ . 8w PI, Vehicle group:  $F = 0.15$ ,  $P = 0.0002$ ; EMSCs group:  $F = 0.16$ ,  $P < 0.0001$ ; PMECs group:  $F = 0.09$ ,  $P < 0.0001$ .) &  $P < 0.01$  Vs Vehicle group (3w PI, EMSCs group:  $F = 0.18$ ,  $P < 0.0001$ ; PMECs group:  $F = 0.35$ ,  $P < 0.0001$ . 8w PI, EMSCs group:  $F = 1.06$ ,  $P = 0.0005$ ; PMECs group:  $F = 0.62$ ,  $P = 0.0002$ ) (D-I): EAE induction remarkably decreased the expression of BDNF and CNTF in CNS as compared with healthy controls, and EMSCs and PMSCs treatments maintained expression of these markers. BDNF: \* $P < 0.05$  Vs Normal group (3w Vehicle group:  $F = 4.62$ ,  $P < 0.0001$ ; EMSCs group:  $F = 0.56$ ,  $P = 0.003$ ; PMECs group:  $F = 0.13$ ,  $P = 0.02$ . 8w PI, Vehicle group:  $F = 2.97$ ,  $P = 0.004$ ; EMSCs group:  $F = 8.87$ ,  $P < 0.0001$ ; PMECs group:  $F = 4.12$ ,  $P < 0.0001$ ) &  $P < 0.01$  Vs Vehicle group (3w PI, EMSCs group:  $F = 1.78$ ,  $P < 0.0001$ ; PMECs group:  $F = 0.22$ ,  $P < 0.0001$ . 8w PI, EMSCs group:  $F = 2.99$ ,  $P < 0.0001$ ; PMECs group:  $F = 1.39$ ,  $P < 0.0001$ ). CNTF: \* $P < 0.05$  Vs Normal group (3w Vehicle group:  $F = 4.32$ ,  $P < 0.0001$ ; EMSCs group:  $F = 0.24$ ,  $P = 0.02$ ; 8w PI, Vehicle group:  $F = 1.01$ ,  $P < 0.0001$ ; EMSCs group:  $F = 0.47$ ,  $P = 0.0003$ ) &  $P < 0.01$  Vs Vehicle group (3w PI, EMSCs group:  $F = 0.15$ ,  $P = 0.002$ ; PMECs group:  $F = 0.04$ ,  $P = 0.0009$ . 8w PI, EMSCs group:  $F = 0.46$ ,  $P < 0.0001$ ; PMECs group:  $F = 0.48$ ,  $P < 0.0001$ ). #  $P < 0.05$  Vs EMSCs group (3w PI, PMSCs group:  $F = 0.64$ ,  $P = 0.04$ ; 8w PI, PMSCs group:  $F = 0.97$ ,  $P = 0.005$ ). (J-O): In vehicle-treated EAE rats, the expression of active caspase-3 is markedly increased and the expression of NF-200 was evidently down regulated. This phenomenon could be reversed by EMSCs and



PMSCs transplantation. Caspase-3: \* $P < 0.05$  Vs Normal group (3w Vehicle group:  $F = 2.38$ ,  $P < 0.0001$ ; EMSCs group:  $F = 0.29$ ,  $P < 0.0001$ . PMECs group:  $F = 0.31$ ,  $P < 0.0001$ ; 8w PI, Vehicle group:  $F = 0.01$ ,  $P = 0.0004$ ; EMSCs group:  $F = 0.02$ ,  $P = 0.009$ . PMECs group:  $F = 0.01$ ,  $P = 0.001$ ) &  $P < 0.01$  Vs Vehicle group (3w PI, EMSCs group:  $F = 0.12$ ,  $P < 0.0001$ ; PMECs group:  $F = 0.13$ ,  $P < 0.0001$ . 8w PI, EMSCs group:  $F = 1.49$ ,  $P = 0.001$ ; PMECs group:  $F = 0.53$ ,  $P = 0.0006$ ) NF=200: \* $P < 0.01$  Vs Normal group (3w Vehicle group:  $F = 0.44$ ,  $P < 0.0001$ ; EMSCs group:  $F = 0.11$ ,  $P = 0.0009$ ; PMECs group:  $F = 0.08$ ,  $P = 0.001$ . 8w PI, Vehicle group:  $F = 0.48$ ,  $P < 0.0001$ ) &  $P < 0.01$  Vs Vehicle group (3w PI, EMSCs group:  $F = 0.25$ ,  $P < 0.0001$ ; PMECs group:  $F = 0.18$ ,  $P < 0.0001$ . 8w PI, EMSCs group:  $F = 3.85$ ,  $P < 0.0001$ ; PMECs group:  $F = 1.26$ ,  $P < 0.0001$ ). (P-R): GFAP expression visibly increased at both week 3 and week 8 following EAE induction, but decreased following EMSCs and PMSCs treatments as shown by Western blotting. \* $P < 0.01$  Vs Normal group (3w Vehicle group:  $F = 0.3$ ,  $P < 0.0001$ ; 8w PI, Vehicle group:  $F = 3.6$ ,  $P < 0.0001$ ) &  $P < 0.01$  Vs Vehicle group (3w PI, EMSCs group:  $F = 1.93$ ,  $P < 0.0001$ ; PMECs group:  $F = 2.56$ ,  $P < 0.0001$ . 8w PI, EMSCs group:  $F = 0.07$ ,  $P < 0.0001$ ; PMECs group:  $F = 0.2$ ,  $P < 0.0001$ ). Data are represented as mean  $\pm$  SD.  $n = 5$ , degrees of freedom =  $n - 1$ .

**Figure S9. EMSCs and PMSCs treatments reduce neuronal loss.** Visible neuronal loss is observed in the brain cortex (B) and spinal cord (F) in CNS of the vehicle-treated EAE rats at 8 weeks post-injection, when compared with healthy animals (A, E). Nevertheless, in EMSCs and PMSCs-treated EAE rats, more neurons are present in the anterior horn of the spinal cord (G-H) and in the motor cortices (C-D). Nissl staining, scale bar = 100  $\mu$ m. (I-K): The

transplanted EMSCs and PMECs obviously infiltrated into spinal cord parenchymal (I) and formed MSCs masses inside the brain parenchymal tissue (J, K). (L): Number of surviving neural cells calculated in the different groups at 8 weeks post-injection following Nissl staining (each group is presented as a percentage of the healthy control). Data are represented as mean  $\pm$  SD. N=5, degrees of freedom=4. \*P<0.01 Vs Normal group (In SP, Vehicle group: F=0.15, P<0.0001; EMSCs group: F=0.14, P=0.003; PMECs group: F=0.06, P=0.0018. In BC, Vehicle group: F=1.18, P<0.0001; EMSCs group: F=1.02, P<0.0001; PMECs group: F=0.6, P<0.0001) & P<0.01 Vs Vehicle group (In SP, EMSCs group: F=0.94, P<0.0001; PMECs group: F=0.37, P<0.0001. In BC, EMSCs group: F=0.86, P<0.0001; PMECs group: F=0.51, P=0.0001.) # P<0.01 Vs EMSCs group (In SP, PMSCs group: F=0.37, P=0.013).

Supplemental figures

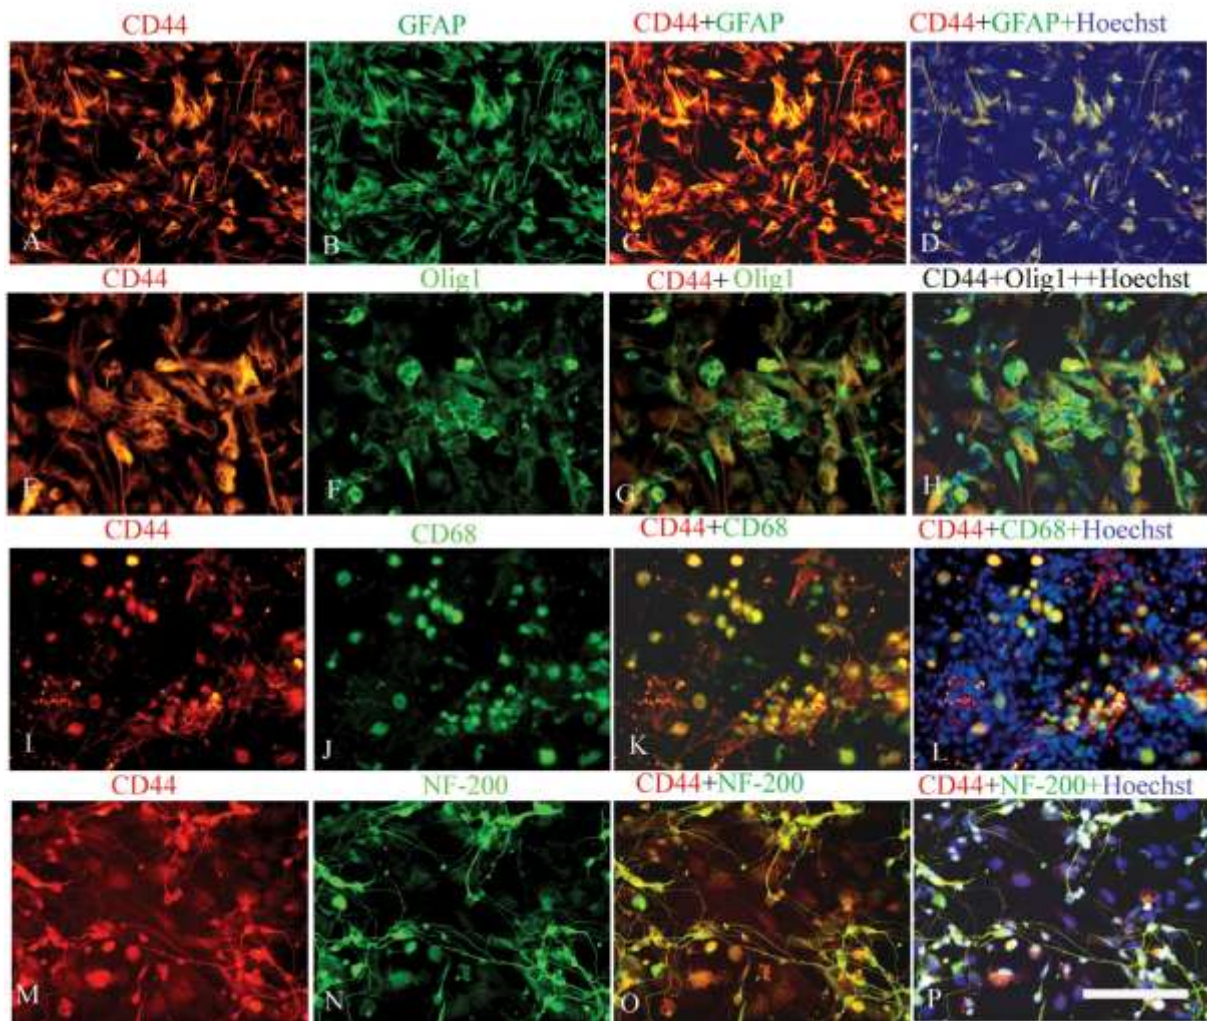

Figure S1

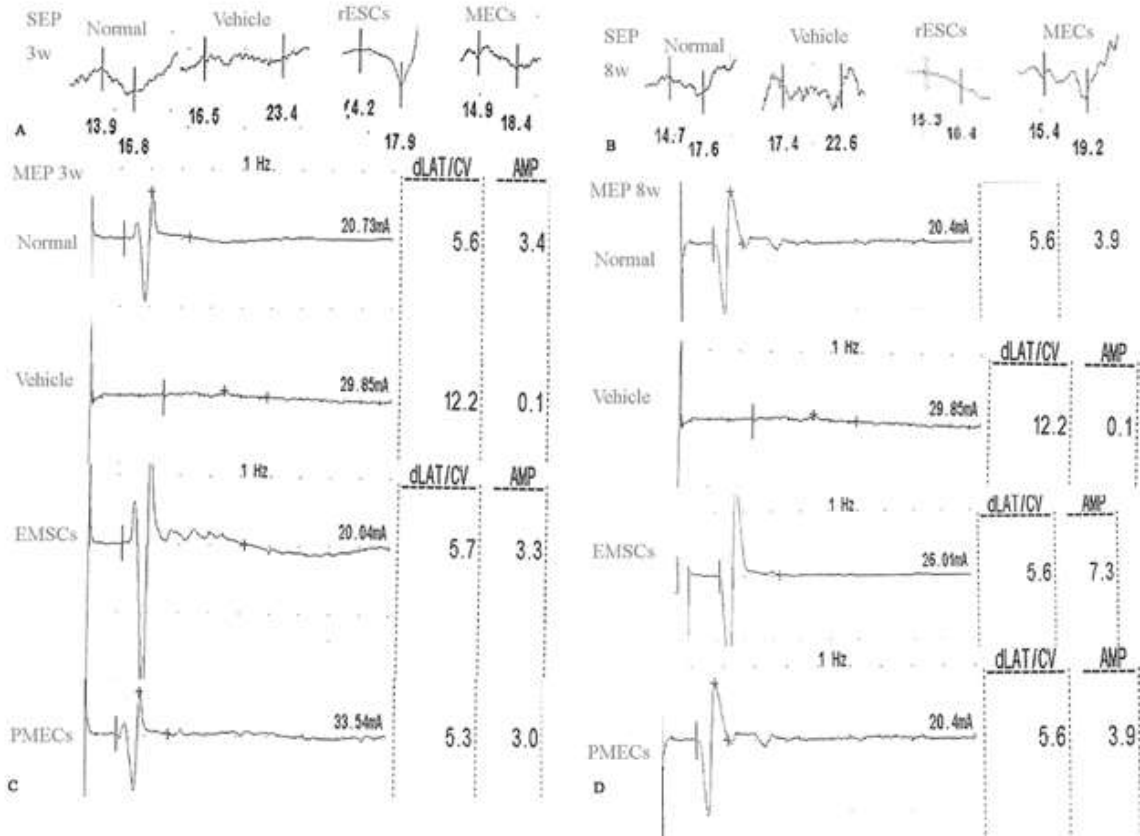

**Figure S2**

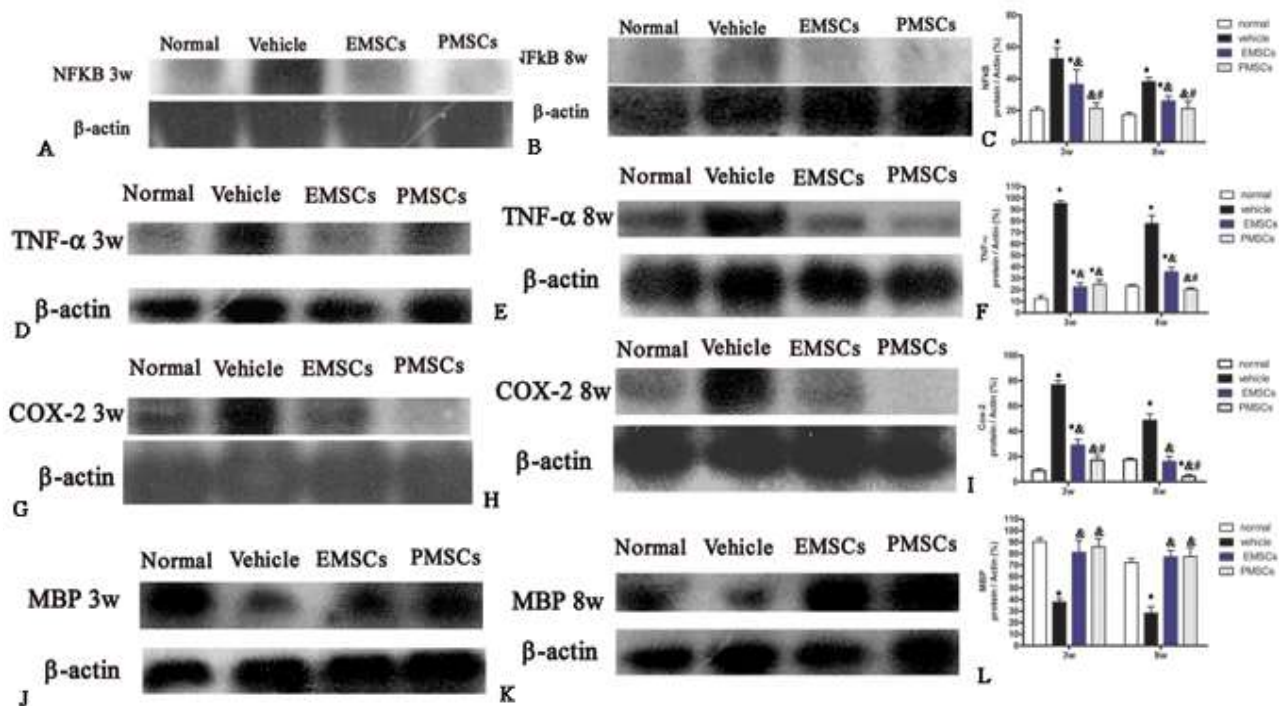

Figure S3

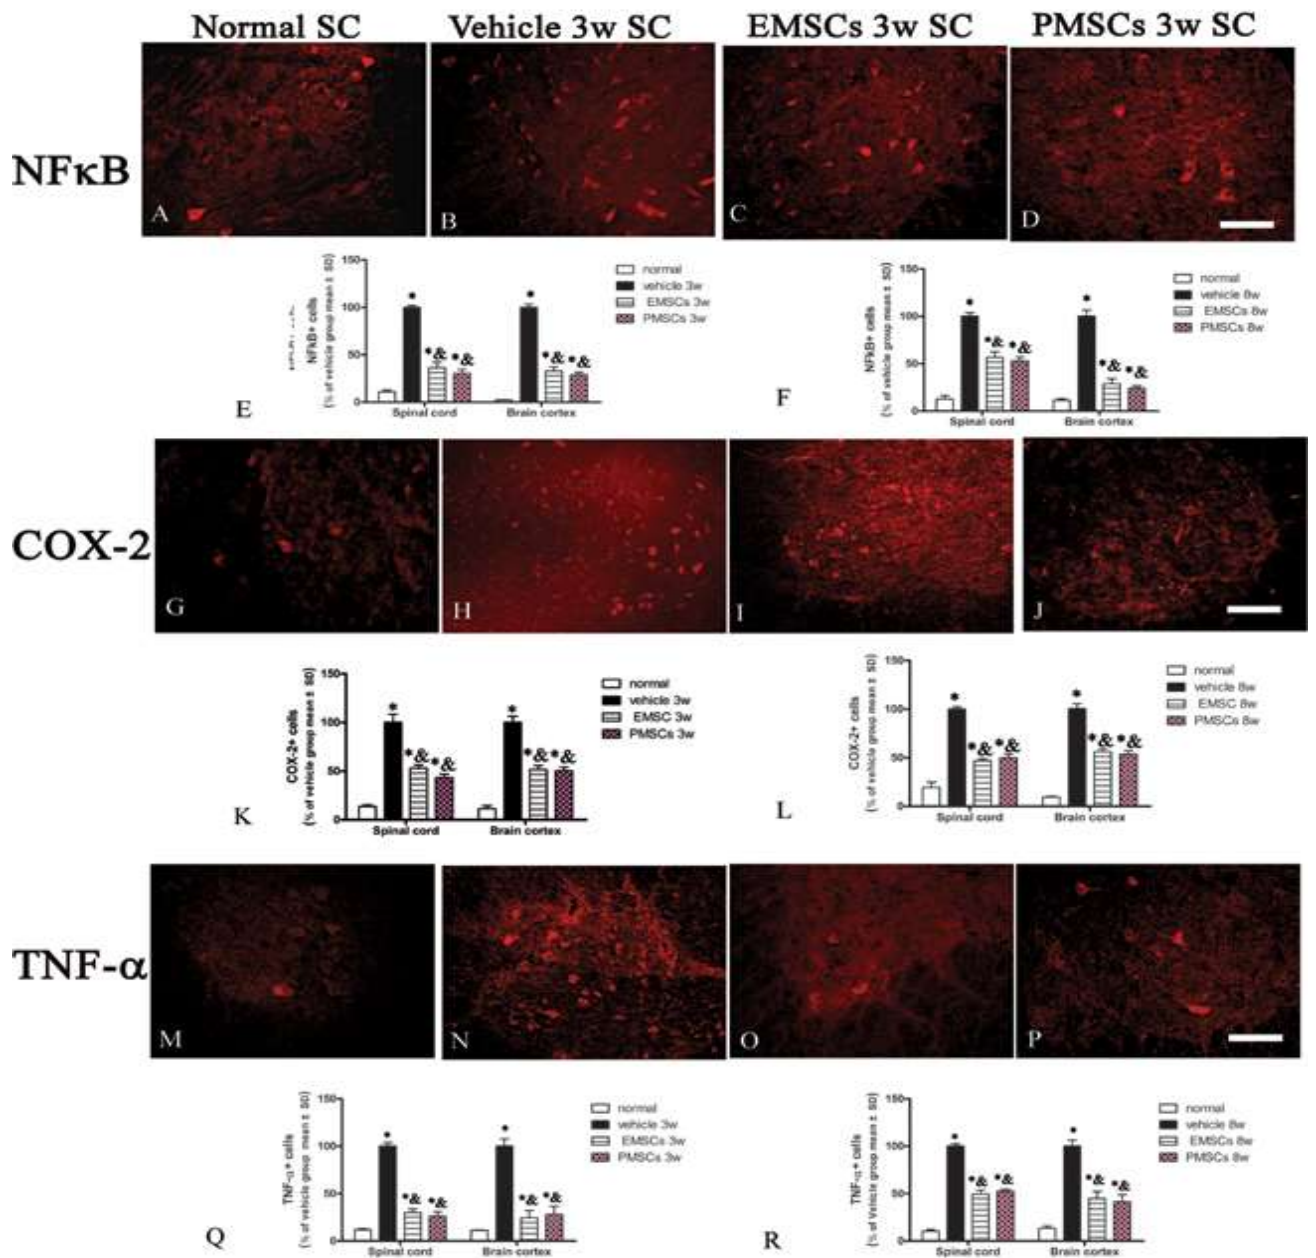

FigureS4



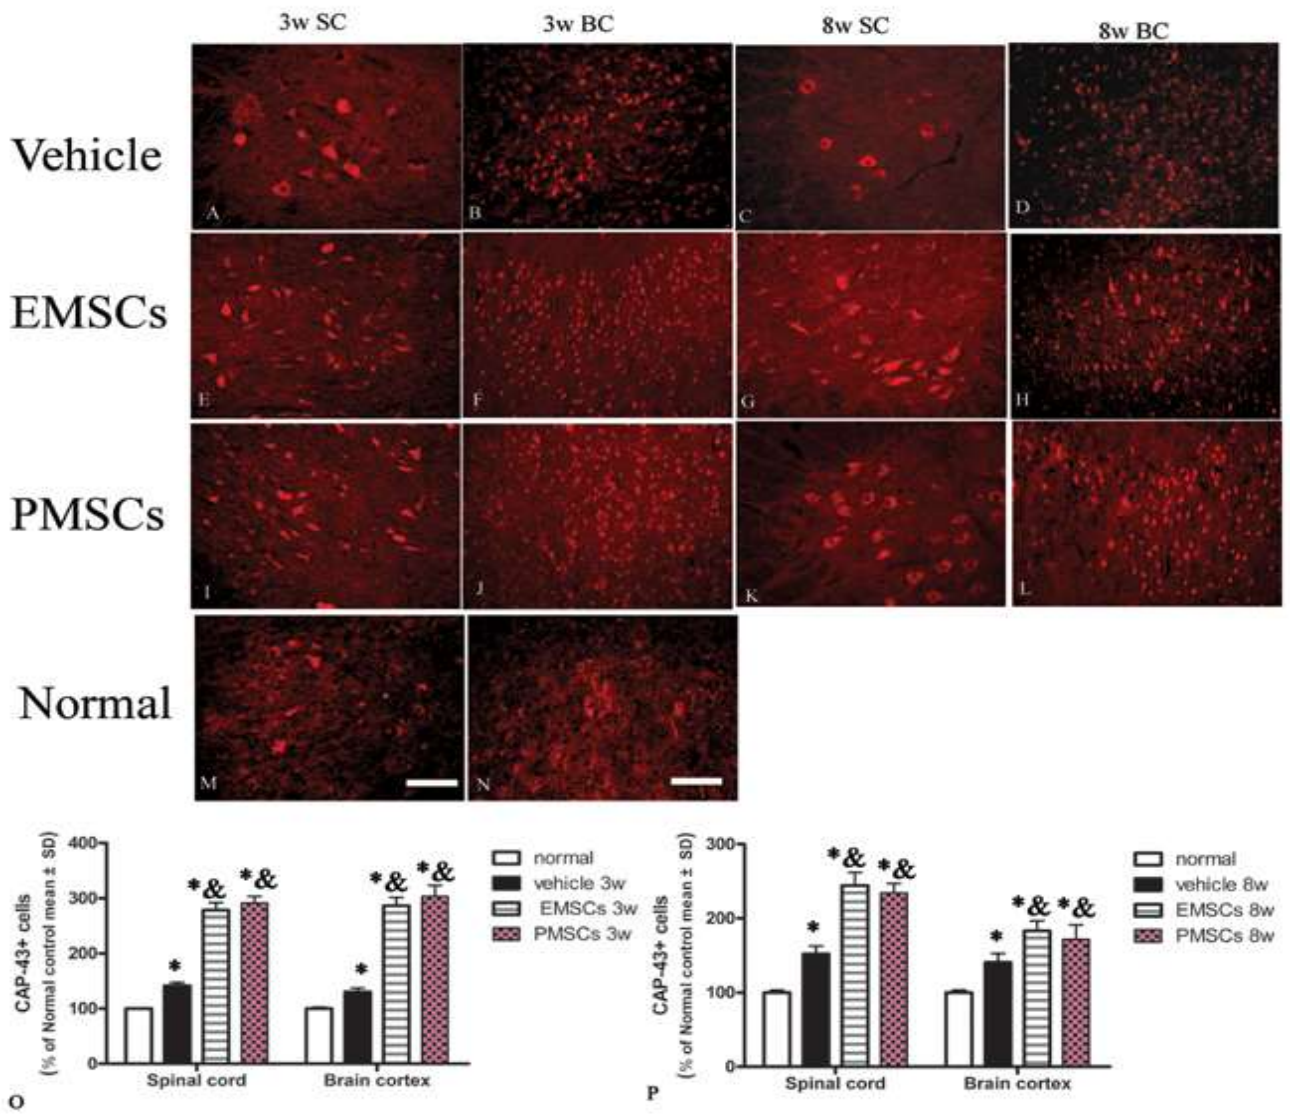

Figure S5

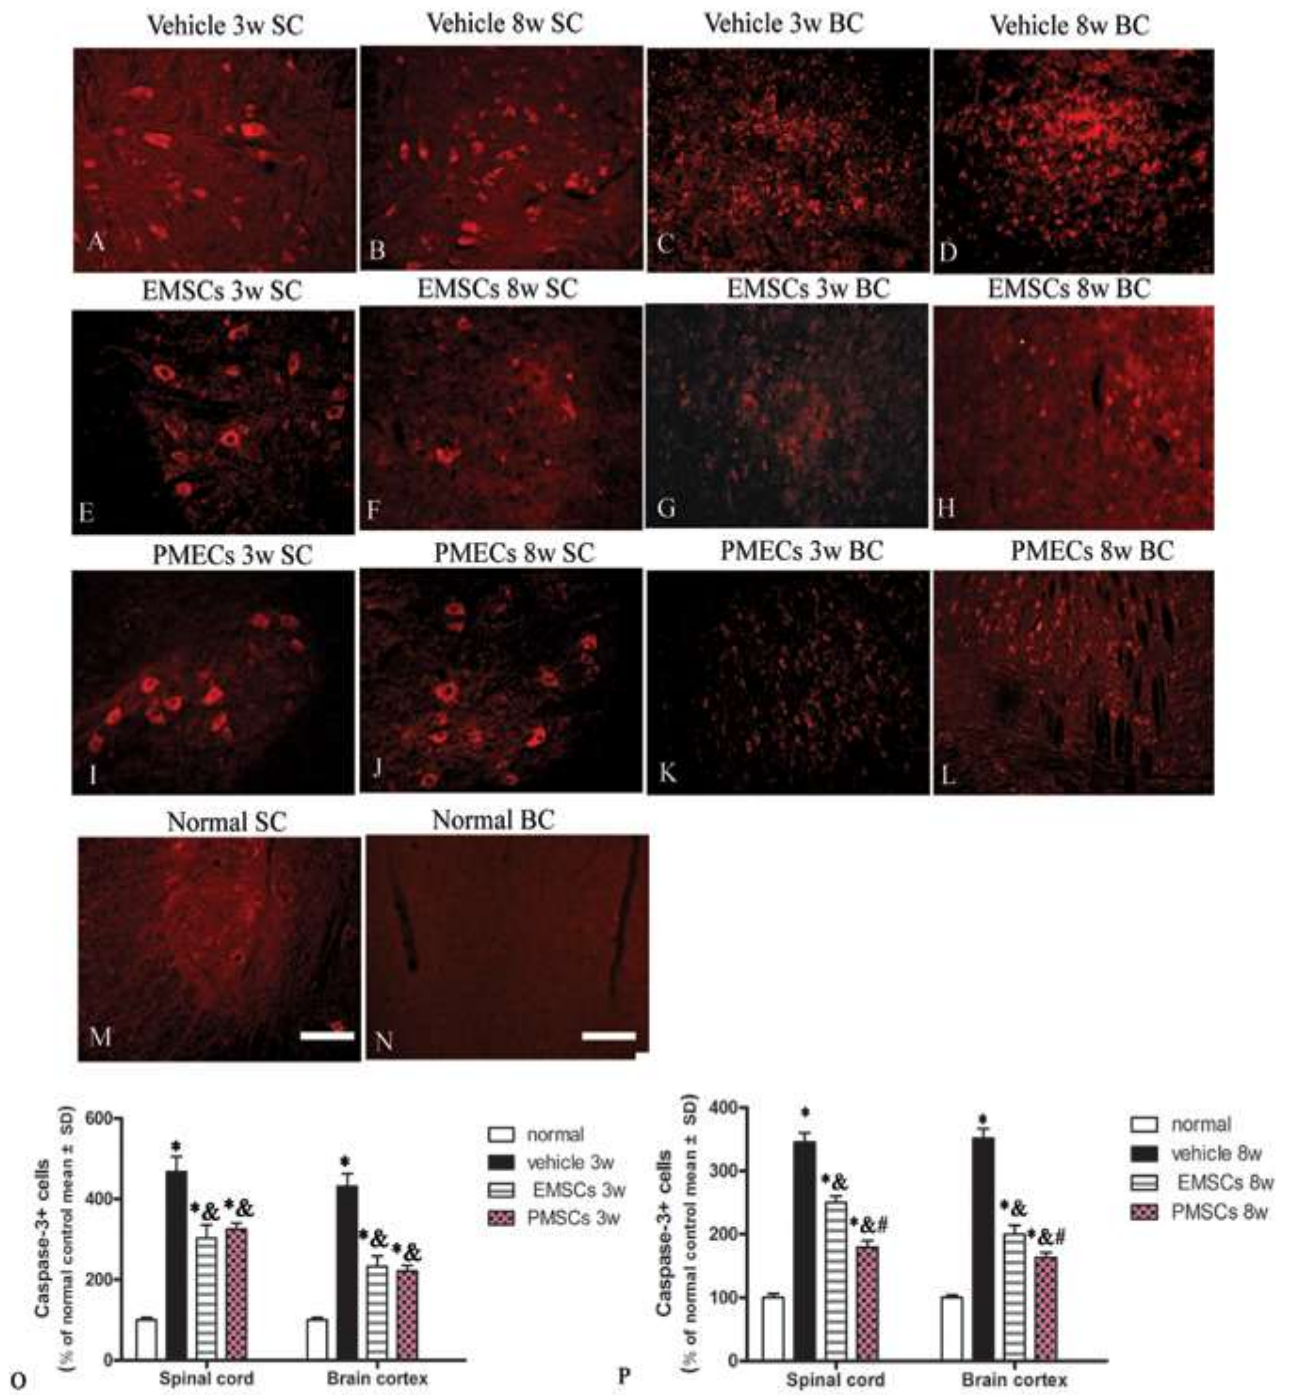

Figure S6



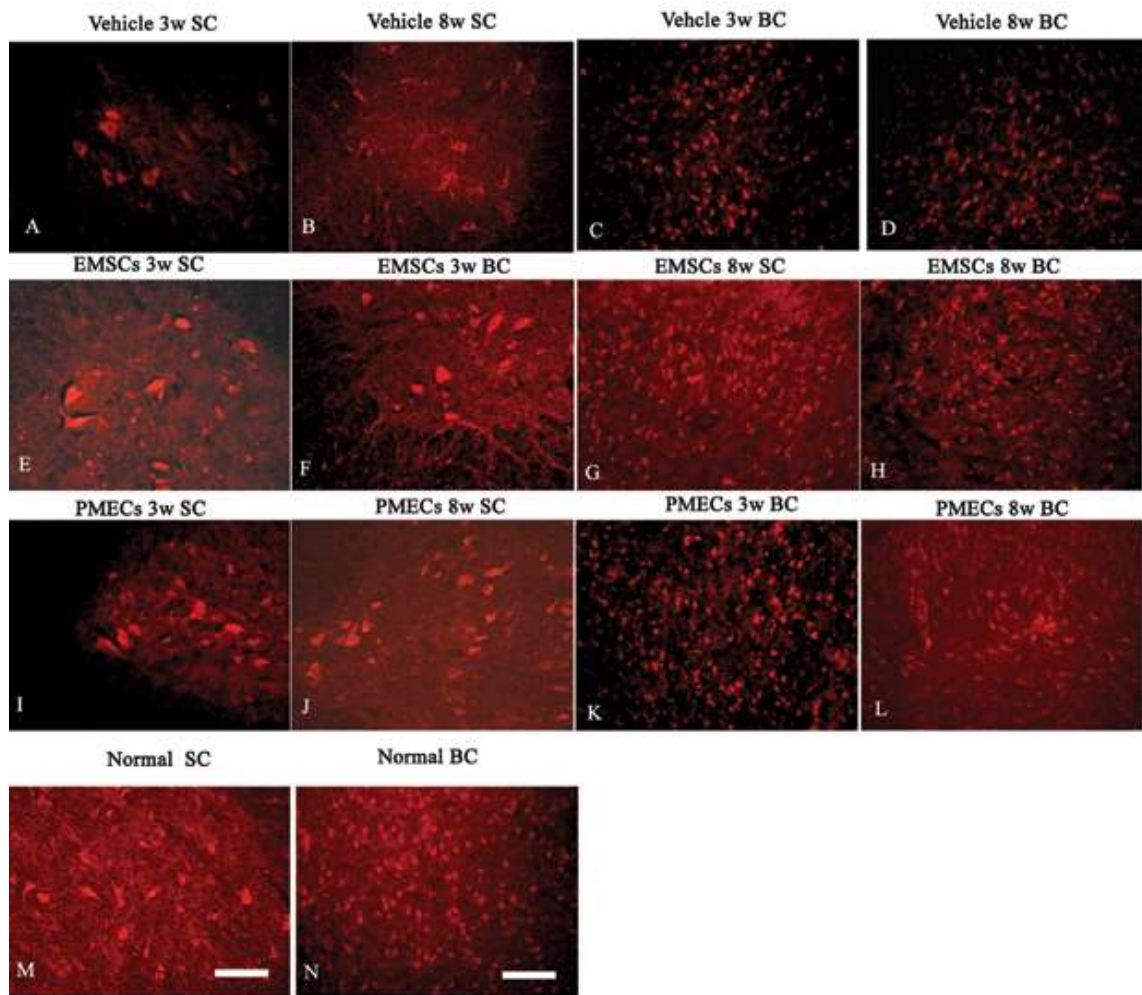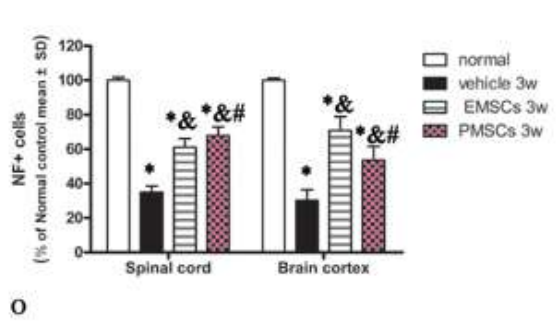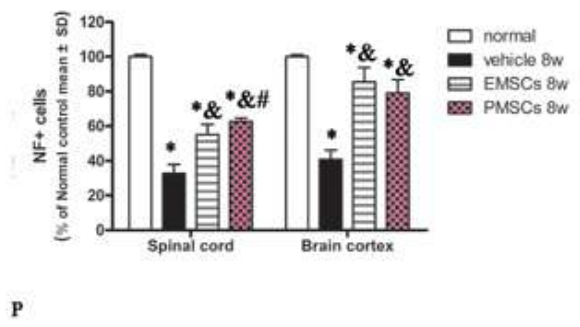

**Figure S7**

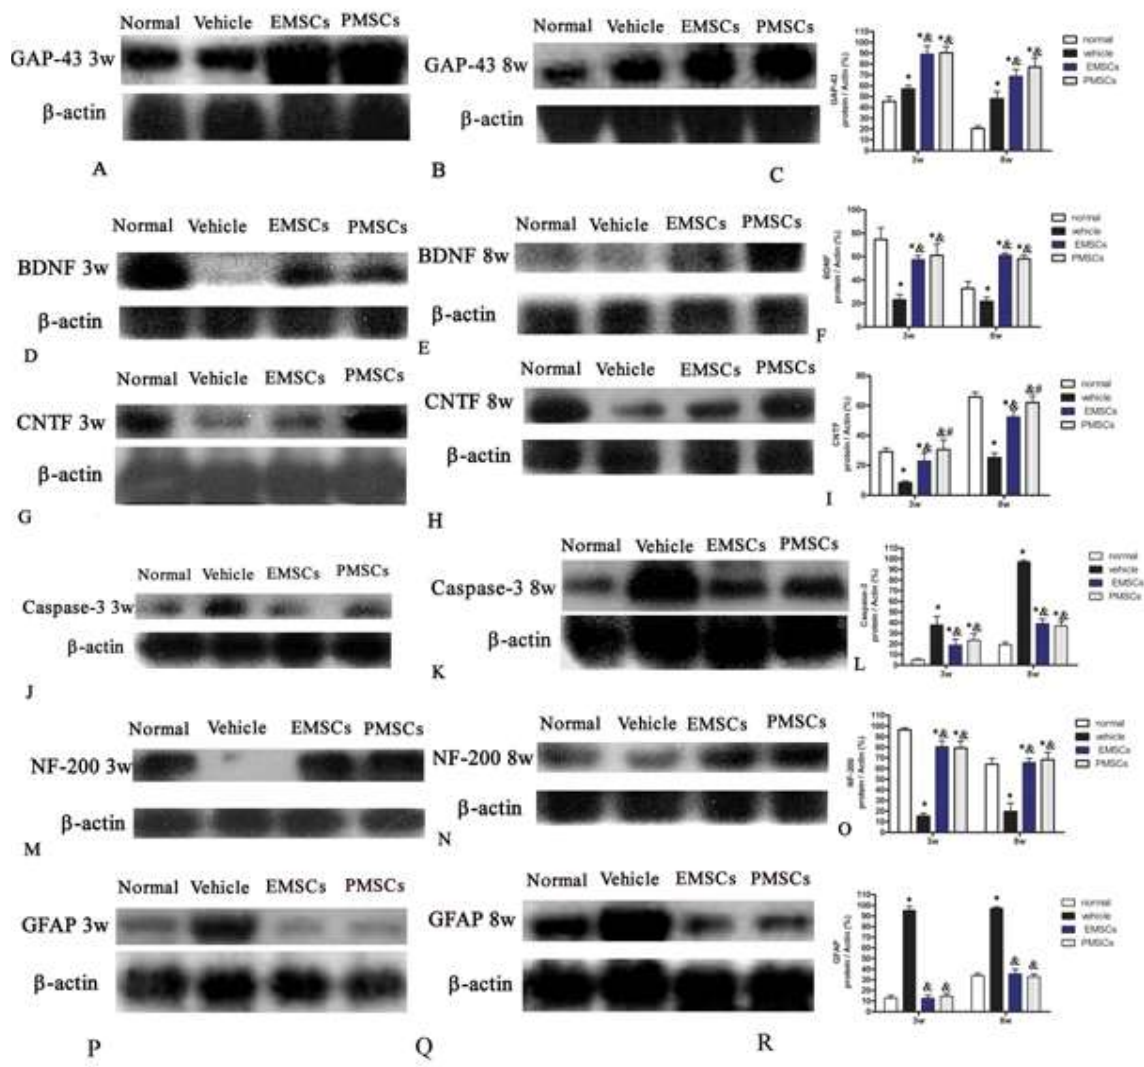

**Figure S8**

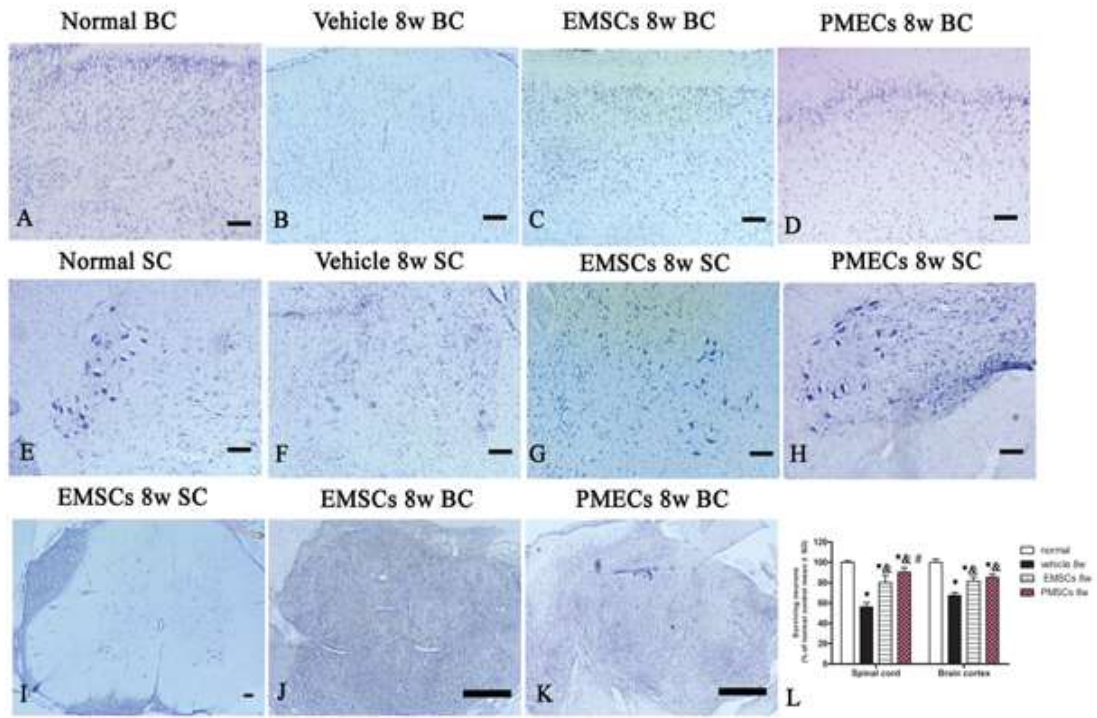

**Figure S9**
